# Supplementary material
Source: Springer Nature journal article supplement (https://www.springermedizin.de/resource/supplementary/12967_2013_1672_MOESM7_ESM.pdf/9574616)

**A**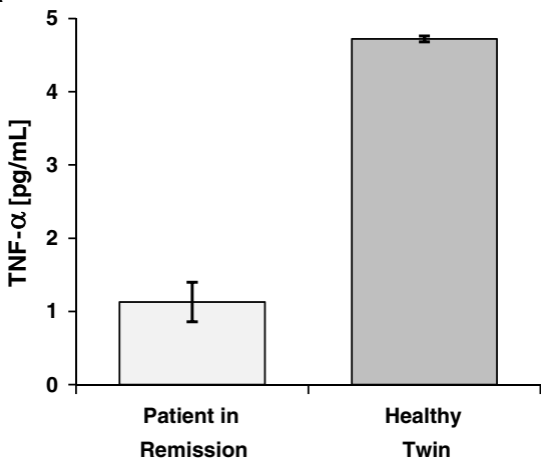**B**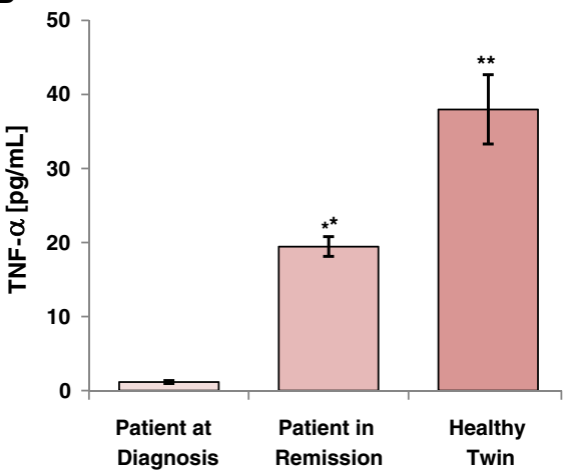**C**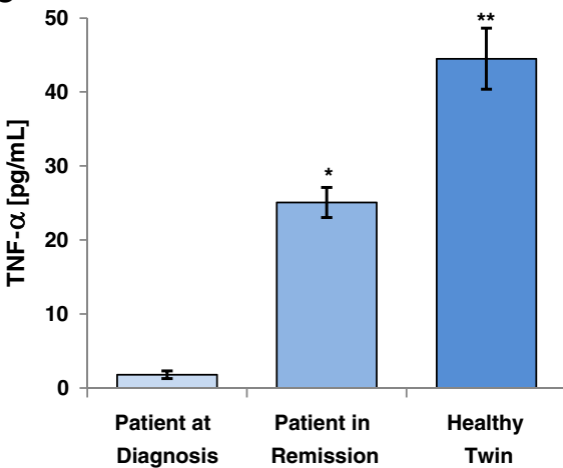

Supplement: MOESM7 [file 9574616]
